# Supplementary material
Source: publisher figshare collection journal article supplement (https://acs.figshare.com/ndownloader/files/3786856)
Supplement: Supplementary file 1 [file 3786856]

*Supporting Information for*

**Anionic Group Self-Doping as a Promising Strategy:  
Band-Gap Engineering and Multi-Functional  
Applications of High-Performance  $\text{CO}_3^{2-}$  Doped  
 $\text{Bi}_2\text{O}_2\text{CO}_3$**

Hongwei Huang<sup>\*,†</sup>, Xiaowei Li<sup>†</sup>, Jinjian Wang<sup>†</sup>, Fan Dong<sup>\*,‡</sup>, Paul K. Chu<sup>§</sup>, Tierui Zhang<sup>£</sup>, Yihe Zhang<sup>\*,†</sup>

*†Beijing Key Laboratory of Materials Utilization of Nonmetallic Minerals and Solid Wastes, National Laboratory of Mineral Materials, School of Materials Science and Technology, China University of Geosciences, Beijing 100083, China*

*‡Chongqing Key Laboratory of Catalysis and Functional Organic Molecules, College of Environmental and Bio-logical Engineering, Chongqing Technology and Business University, Chongqing, 400067, China*

*§Department of Physics and Materials Science, City University of Hong Kong, Tat Chee Avenue, Kowloon, Hong Kong, China*

*£Key Laboratory of Photochemical Conversion and Optoelectronic Materials, Technical Institute of Physics and Chemistry, Chinese Academy of Sciences, Beijing 100190, China*

\*Corresponding author. Tel.: +86-10-82322247.

E-mail address: [hww@cugb.edu.cn](mailto:hww@cugb.edu.cn) (H. W. Huang); [dfctbu@126.com](mailto:dfctbu@126.com) (F. Dong); [zyh@cugb.edu.cn](mailto:zyh@cugb.edu.cn) (Y. H. Zhang)

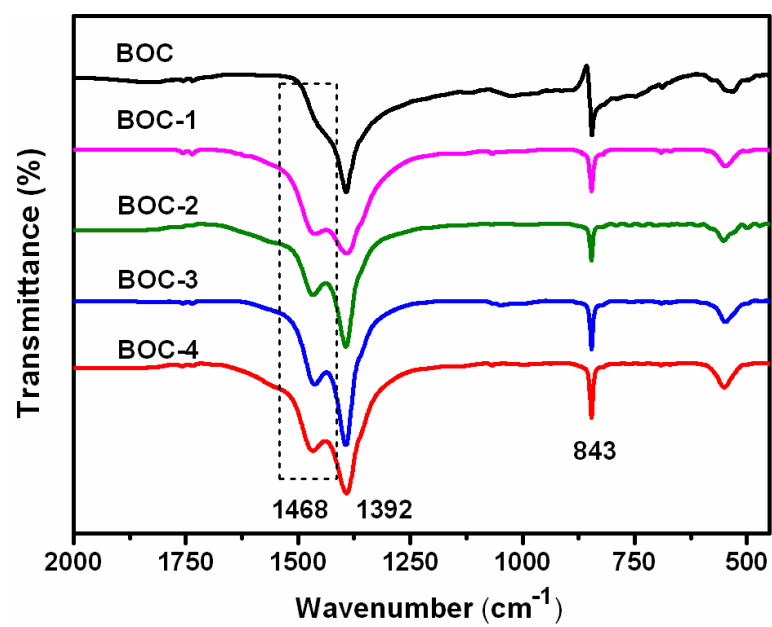

**Figure S1.** FTIR spectra of pristine BOC and C-BOC samples.

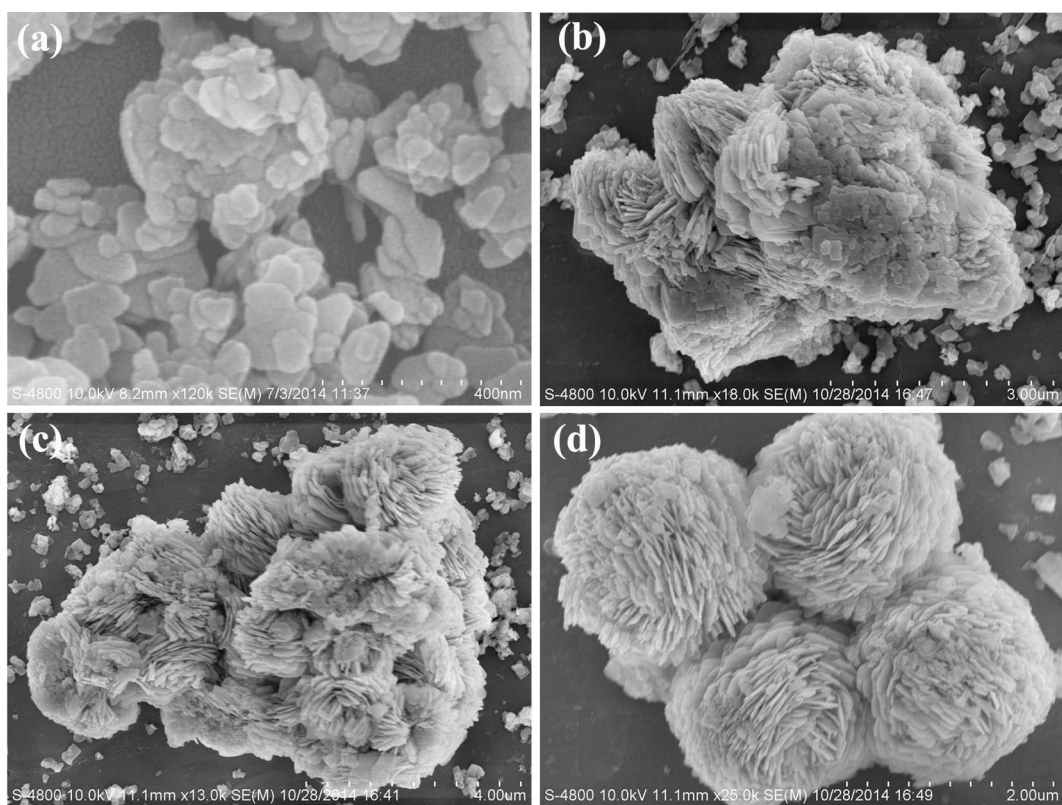

**Figure S2.** SEM images of (a) the pristine  $\text{Bi}_2\text{O}_2\text{CO}_3$ , (b) BOC-1, (c) BOC-2 and (d) BOC-4.

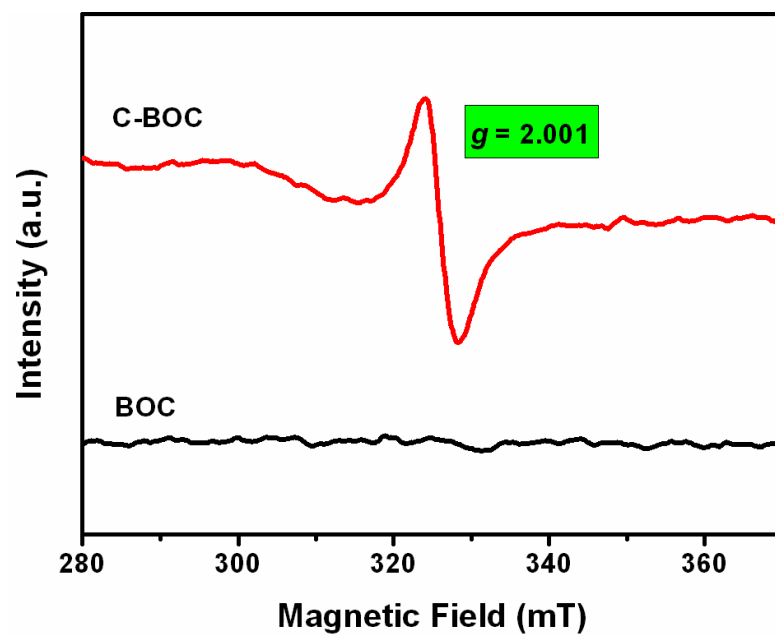

**Figure S3.** *In situ* EPR spectra of BOC and C-BOC (BOC-3).

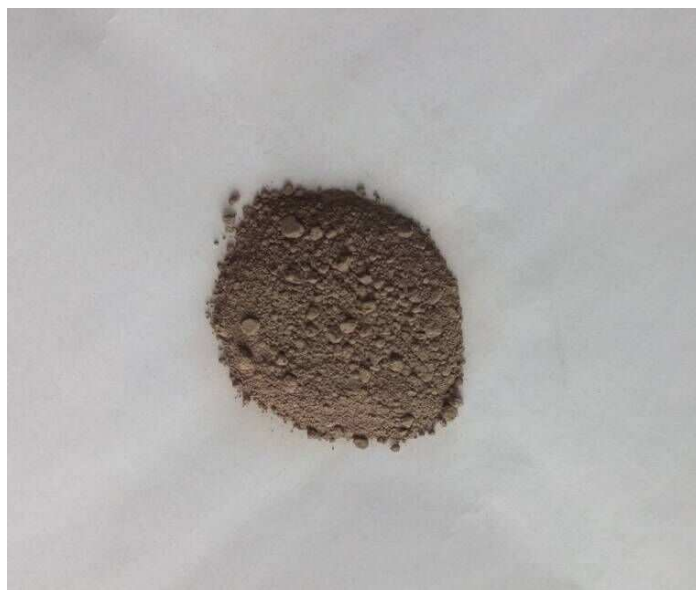

**Figure S4.** Photo of carbon-doped  $\text{Bi}_2\text{O}_2\text{CO}_3$  sample.

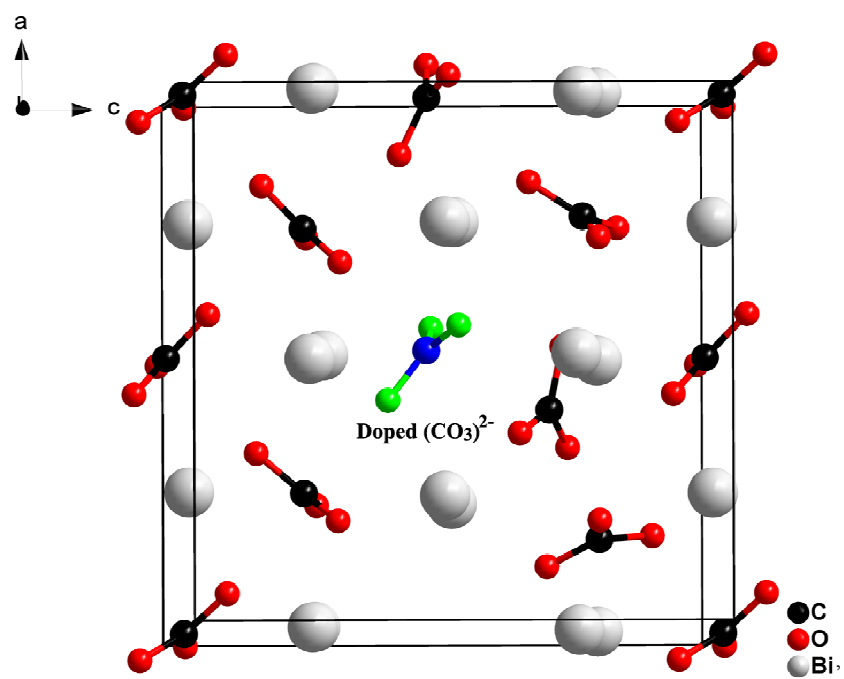

**Figure S5.** Arrangement of  $\text{CO}_3^{2-}$  ions in self-doped  $\text{Bi}_2\text{O}_2\text{CO}_3$ .

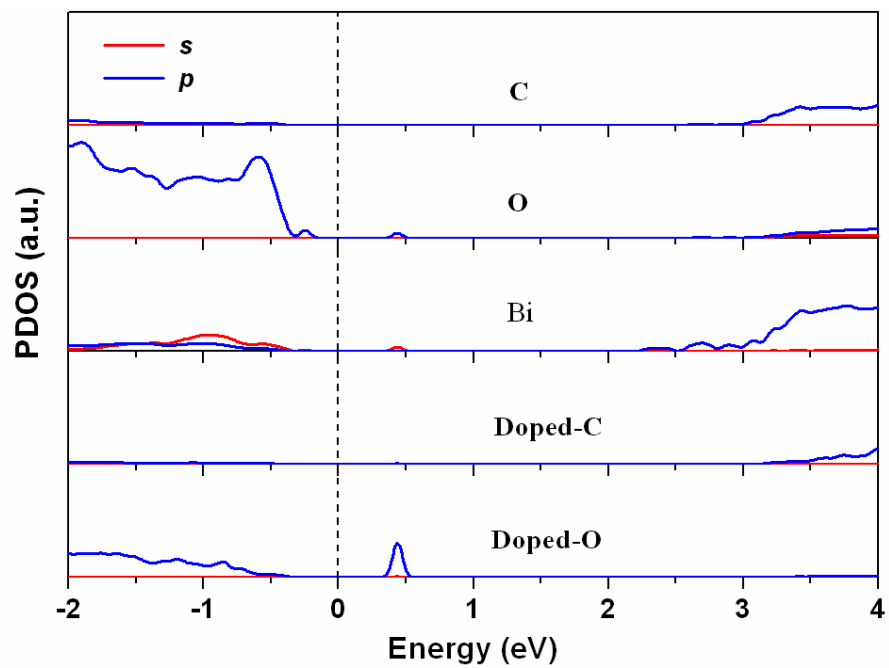

**Figure S6.** PDOS of  $\text{CO}_3^{2-}$  self-doped  $\text{Bi}_2\text{O}_2\text{CO}_3$  sample.

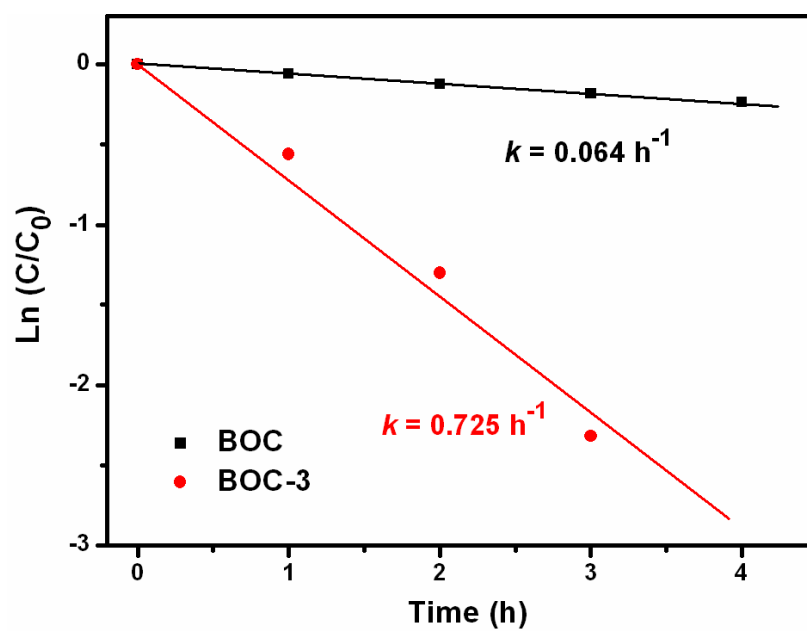

**Figure S7.** The first-order kinetics photodegradation curves of BPA by BOC and BOC-3 under simulated solar light illumination.



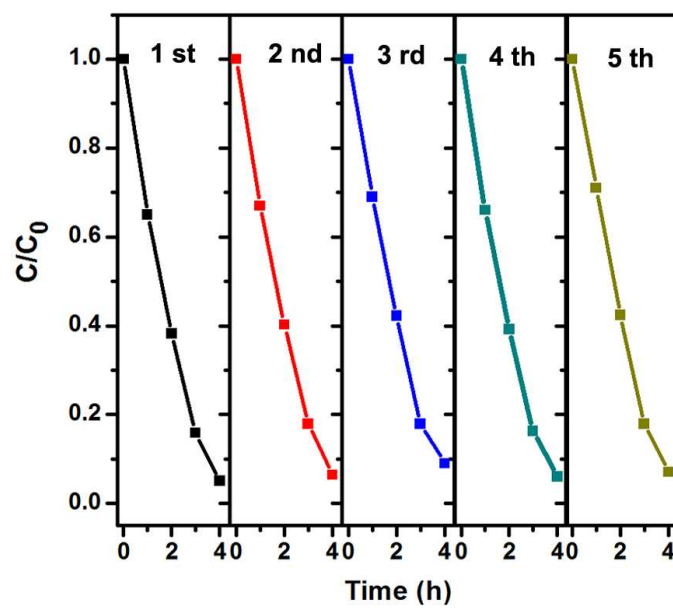

**Figure S8.** Recycling test for photodegradation of BPA under visible light ( $\lambda > 420$  nm).

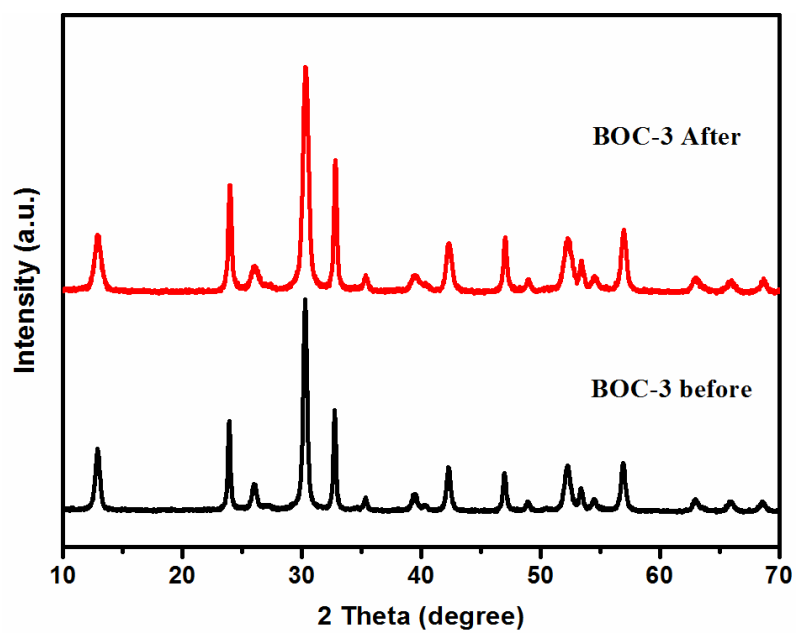

**Figure S9.** XRD patterns of BOC-3 sample before and after irradiation.
